# Supplementary material for: Characterizing bacterial communities in paper production—troublemakers revealed
Source: PubMed Central journal article supplement (PMC5552955; doi:10.1002/mbo3.487), 2017-05-14
Supplement: MBO3-6-na-s001.pdf [file MBO3-6-na-s001.pdf]

Table S1. Sample description.

| ID | Paper machine | Sampling site         | Constitution |
|----|---------------|-----------------------|--------------|
| -  | PM1           | <i>Clear filtrate</i> | liquid       |
| -  | PM1           | <i>White water</i>    | liquid       |
| -  | PM1           | <i>Press water</i>    | liquid       |
| -  | PM2           | <i>Clear filtrate</i> | liquid       |
| -  | PM2           | <i>White water</i>    | liquid       |
| -  | PM2           | <i>Press water</i>    | liquid       |
| -  | PM3           | <i>Clear filtrate</i> | liquid       |
| -  | PM3           | <i>White water</i>    | liquid       |
| -  | PM3           | <i>Press water</i>    | liquid       |
| -  | PM4           | <i>Clear filtrate</i> | liquid       |
| -  | PM4           | <i>White water</i>    | liquid       |
| -  | PM4           | <i>Press water</i>    | liquid       |
| 1  | PM1           | <i>Paper</i>          | solid        |
| 2  | PM1           | <i>Paper</i>          | solid        |
| 3  | PM1           | <i>Paper</i>          | solid        |
| 4  | PM1           | <i>Paper</i>          | solid        |
| 5  | PM1           | <i>Paper</i>          | solid        |
| 6  | PM1           | <i>Paper</i>          | solid        |
| 7  | PM1           | <i>Paper</i>          | solid        |
| 8  | PM1           | <i>Paper</i>          | solid        |
| 9  | PM1           | <i>Paper</i>          | solid        |
