# Supplementary material for: Characterizing bacterial communities in paper production—troublemakers revealed
Source: PubMed Central journal article supplement (PMC5552955; doi:10.1002/mbo3.487), 2017-05-14
Supplement: MBO3-6-na-s002.pdf [file MBO3-6-na-s002.pdf]

Table S2. Diversity analysis and sequencing Statistics. 16S rRNA metagenomics analysis was performed on an Illumina MiSeq. For diversity analysis, the Shannon's index and Evenness was calculated (Shannon and Weaver, 1946) focusing on genera that represent at least 0.5 % of all classified genera.

|                              |             | % Reads                   |                                 |        | Shannon's diversity * | Evenness* | No of genera* |
|------------------------------|-------------|---------------------------|---------------------------------|--------|-----------------------|-----------|---------------|
|                              | Total Reads | Passing Quality Filtering | Reads classified at Genus level |        |                       |           |               |
| <b><i>Clear filtrate</i></b> |             |                           |                                 |        |                       |           |               |
| PM1                          | Total       | 782185                    | 85.0%                           | 69223  | 0.89                  | 0.50      | 6             |
| PM1                          | Live        | 664567                    | 86.8%                           | 69580  | 1.00                  | 0.56      | 6             |
| PM2                          | Total       | 231383                    | 87.6%                           | 121939 | 1.17                  | 0.73      | 6             |
| PM2                          | Live        | 361476                    | 86.8%                           | 87766  | 0.99                  | 0.55      | 5             |
| PM3                          | Total       | 249612                    | 88.6%                           | 209250 | 0.36                  | 0.52      | 2             |
| PM3                          | Live        | 324662                    | 87.0%                           | 188304 | 0.10                  | 0.14      | 2             |
| PM4                          | Total       | 284820                    | 86.4%                           | 121675 | 0.76                  | 0.47      | 5             |
| PM4                          | Live        | 121823                    | 85.0%                           | 43345  | 1.00                  | 0.72      | 4             |
| <b><i>White water</i></b>    |             |                           |                                 |        |                       |           |               |
| PM1                          | Total       | 164484                    | 88.4%                           | 137245 | 1.12                  | 0.58      | 7             |
| PM1                          | Live        | 289474                    | 88.2%                           | 184742 | 0.95                  | 0.53      | 6             |
| PM2                          | Total       | 211518                    | 89.6%                           | 178500 | 1.15                  | 0.59      | 7             |
| PM2                          | Live        | 88417                     | 88.0%                           | 54244  | 0.86                  | 0.48      | 6             |
| PM3                          | Total       | 205434                    | 88.6%                           | 183884 | 1.30                  | 0.81      | 6             |
| PM3                          | Live        | 336905                    | 87.2%                           | 210262 | 1.46                  | 0.81      | 5             |
| PM4                          | Total       | 274173                    | 87.6%                           | 230717 | 0.85                  | 0.44      | 7             |
| PM4                          | Live        | 838642                    | 86.1%                           | 138963 | 1.19                  | 0.66      | 6             |
| <b><i>Press water</i></b>    |             |                           |                                 |        |                       |           |               |
| PM1                          | Total       | 535407                    | 86.7%                           | 104297 | 1.72                  | 0.65      | 18            |
| PM1                          | Live        | 489836                    | 84.7%                           | 19691  | 2.20                  | 0.76      | 14            |
| PM2                          | Total       | 349053                    | 87.5%                           | 154945 | 1.33                  | 0.74      | 6             |
| PM2                          | Live        | 204973                    | 87.2%                           | 120709 | 0.86                  | 0.53      | 5             |

|     |       |        |       |        |      |      |    |
|-----|-------|--------|-------|--------|------|------|----|
| PM3 | Total | 235568 | 87.1% | 44028  | 1.38 | 0.60 | 10 |
| PM3 | Live  | 224485 | 84.2% | 42854  | 1.32 | 0.68 | 7  |
| PM4 | Total | 384081 | 87.7% | 239897 | 1.20 | 0.62 | 8  |
| PM4 | Live  | 223236 | 84.3% | 31119  | 1.68 | 0.81 | 7  |

---

***Samples of defect paper***

|   |  |        |       |        |      |      |   |
|---|--|--------|-------|--------|------|------|---|
| 1 |  | 35227  | 88.6% | 31585  | 0.74 | 0.53 | 4 |
| 2 |  | 105167 | 88.8% | 89928  | 0.82 | 0.59 | 4 |
| 3 |  | 127347 | 87.9% | 107787 | 0.63 | 0.91 | 2 |
| 4 |  | 120698 | 88.2% | 104633 | 0.77 | 0.43 | 6 |
| 5 |  | 270993 | 88.8% | 231076 | 0.60 | 0.87 | 2 |
| 6 |  | 204785 | 90.0% | 180108 | 0.73 | 0.53 | 4 |
| 7 |  | 266673 | 90.2% | 236992 | 0.66 | 0.60 | 3 |
| 8 |  | 176464 | 89.1% | 155906 | 0.65 | 0.59 | 3 |
| 9 |  | 268877 | 89.9% | 206175 | 0.50 | 0.72 | 2 |

---

\* of genera representing at least 0.5 % of all classified reads at genus level.
